# Supplementary material for: Single cell gene expression analysis in injury-induced collective cell migration
Source: Royal Society of Chemistry journal article supplement (doi:10.1039/c3ib40095f), 2013-12-16
Supplement: c3ib40095f.pdf [file c3ib40095f.pdf]

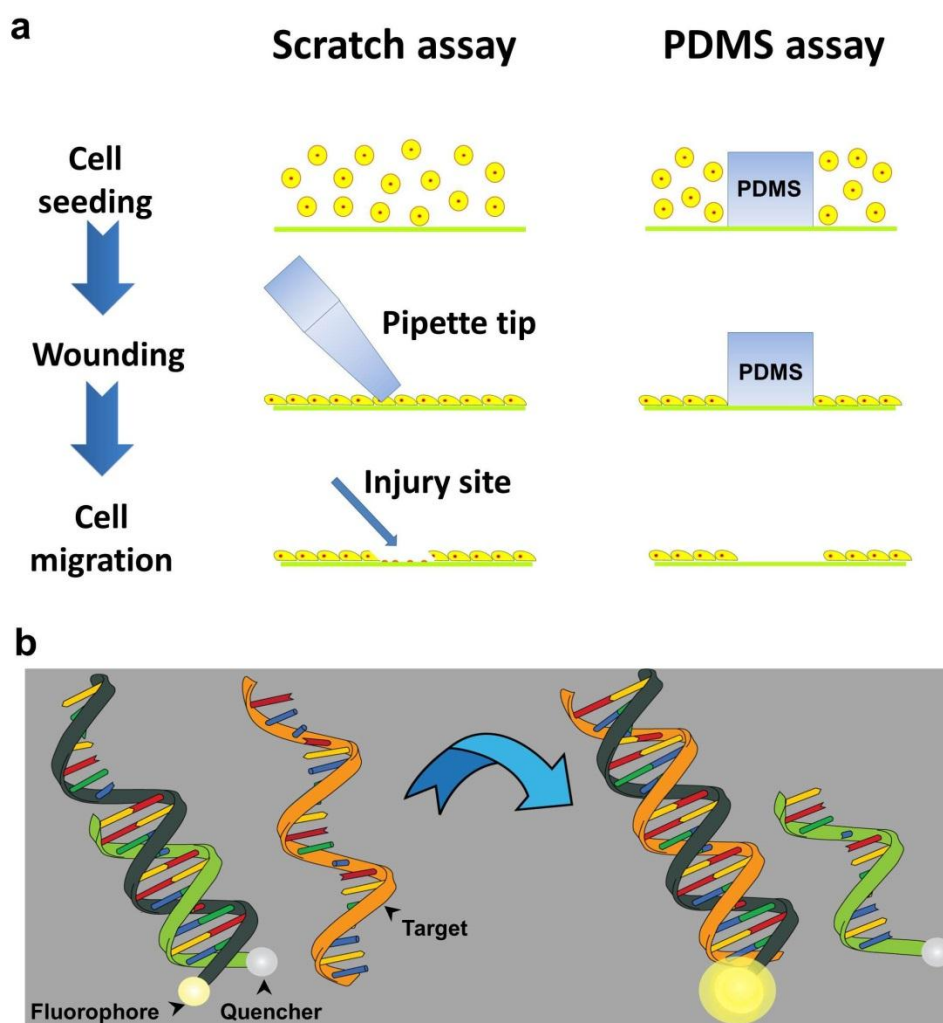

**Fig. S1.** Experimental approaches applied in this study. (a) Wound healing assays with different levels of cell injury. In the scratch assay, cells were seeded and became confluent after 48 hours. A pipette tip was used for creating a wound. In the PDMS assay, a PDMS slab was placed on the surface of the tissue culture well plate before cell seeding. After cells became confluent, the PDMS slab was lifted-off to create free space for cell migration with minimal injury. (b) Schematic of dsLNA probes for single cell analysis. In the absence of a target mRNA, the fluorescent donor is quenched by the quencher, which is in close proximity with the donor. In the presence of a target, the quencher probe is replaced by the target and the donor probe fluoresces.

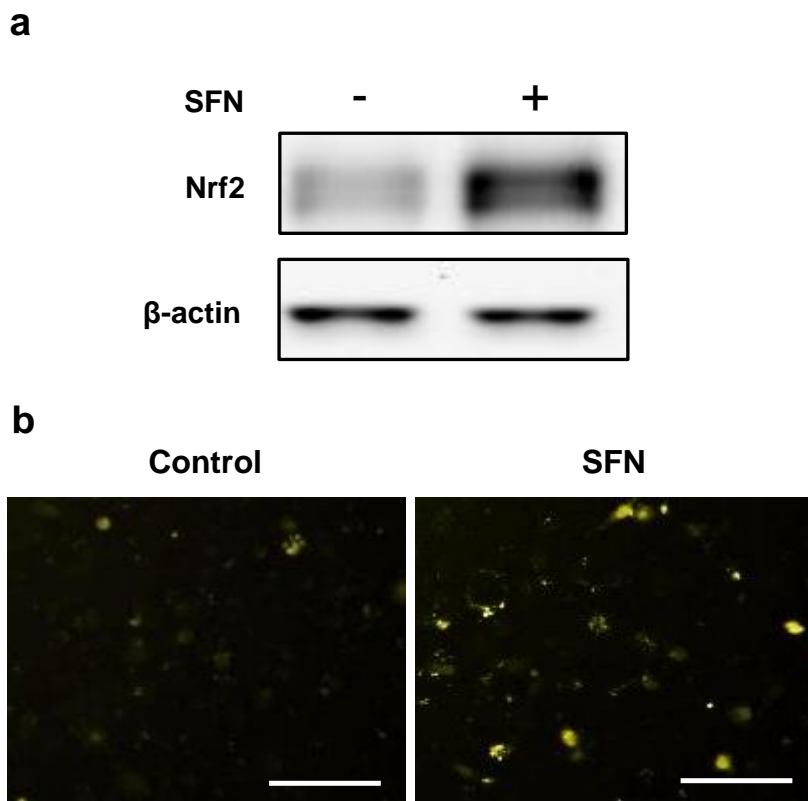

**Fig. S2.** Characterization of the Nrf2-YFP stable cell line. (a) Nrf2 expression in the Nrf2-YFP stable cell line was analyzed by immunoblot.  $\beta$ -actin was used as loading control. (b) Fluorescence characterization of Nrf2 induction in the Nrf2-YFP stable cell line. The cells were treated with 5  $\mu$ M sulforaphane. Nrf2 nuclear accumulation was monitored. Scale bar, 100  $\mu$ m.

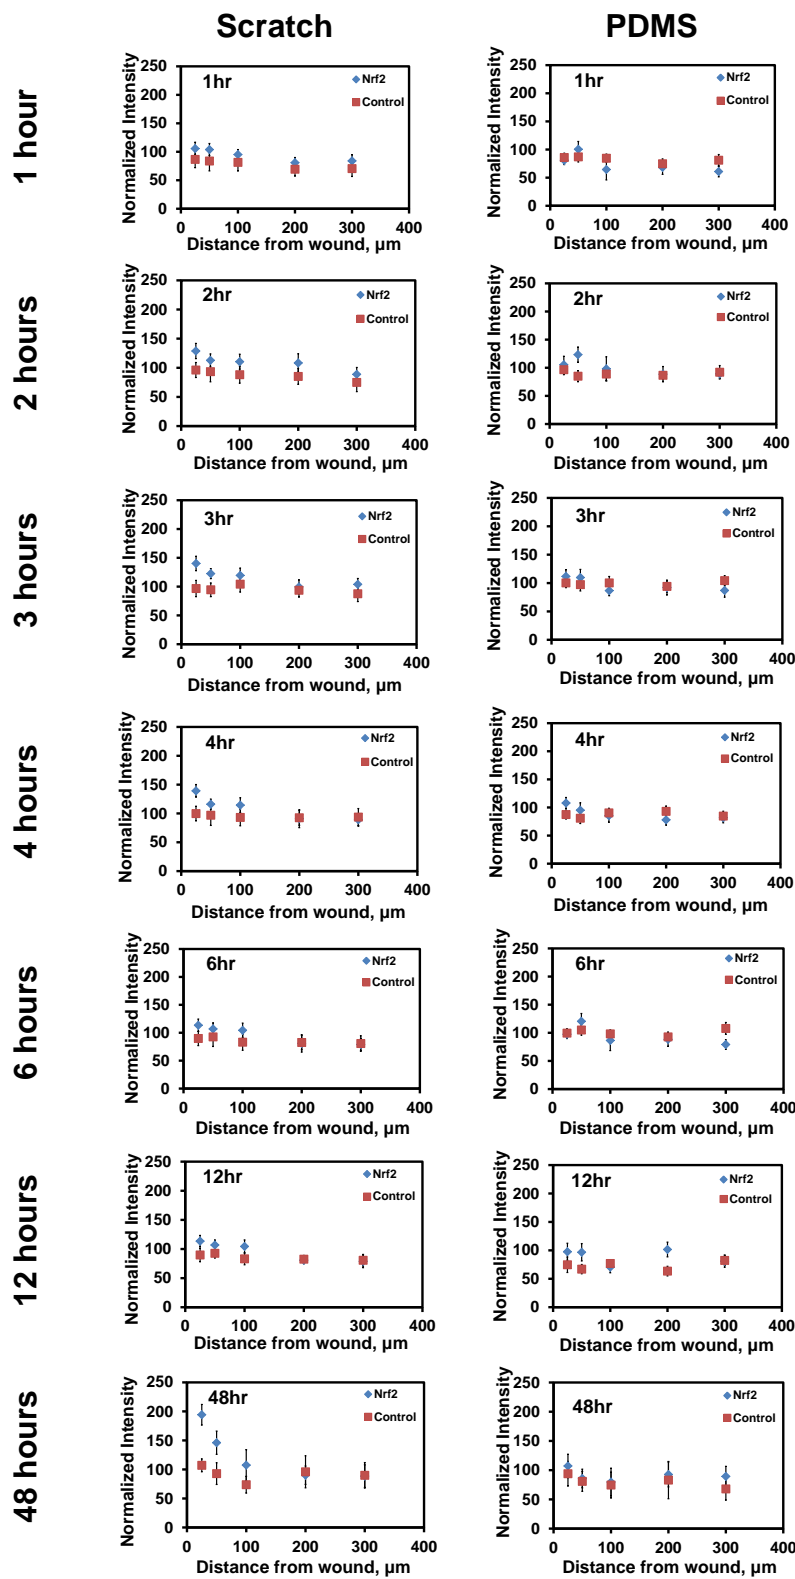

**Fig. S3.** Comparison of the spatial intensity distribution at different time points in the scratch and PDMS assays. Nrf2-YFP and control YFP stable cell lines were tested.

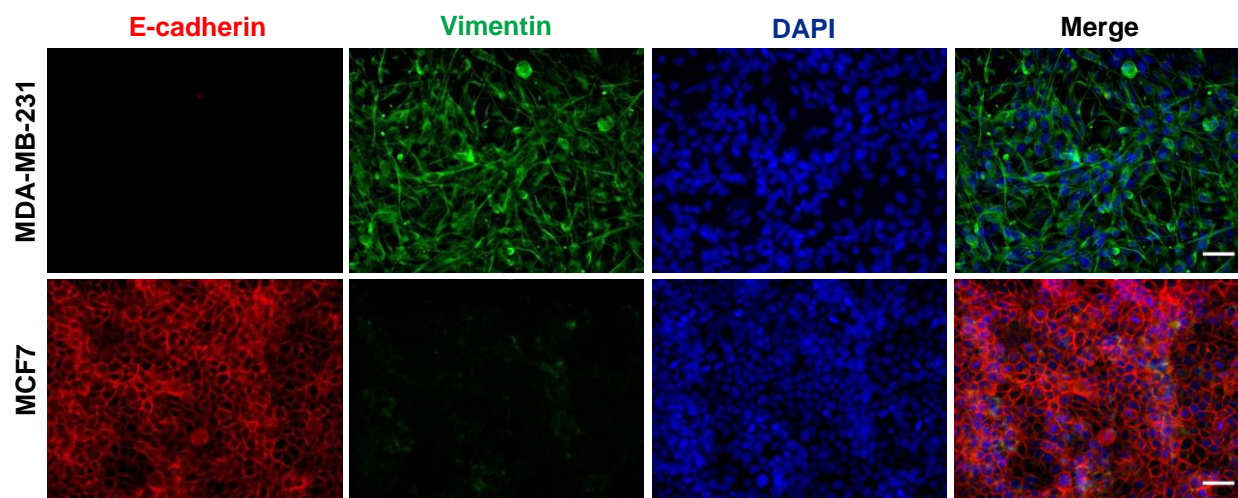

**Fig. S4.** Immunostaining of epithelial and mesenchymal biomarkers. (a) MDA-MB-231 cells, which display mesenchymal behaviors, show high vimentin and low E-cadherin expressions. MCF-7 cells, which display epithelial behaviors, show low vimentin and high E-cadherin expressions. Scale bars, 50  $\mu\text{m}$ .

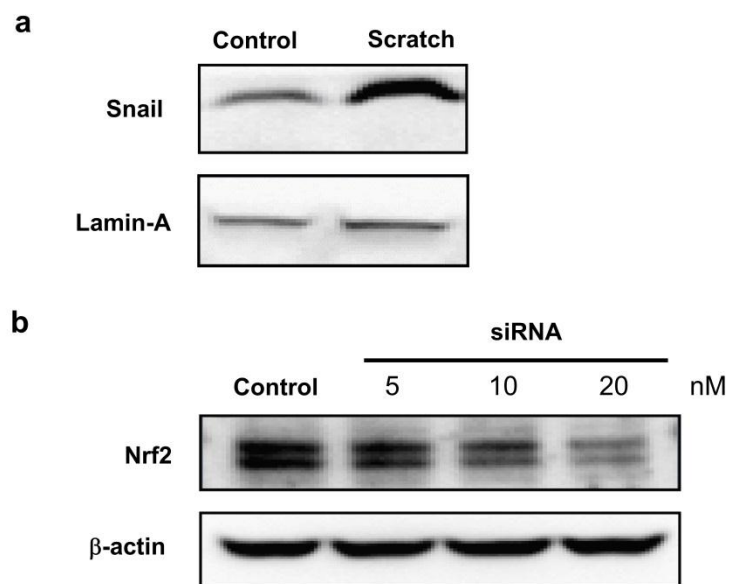

**Fig. S5.** Characterization of injury-induced EMT and Nrf2 siRNA in MCF7 cells. (a) The levels of Snail and Lamin-A protein were tested by immunoblot. (b) Nrf2 suppression at different siRNA concentrations. Cells were transfected with either scrambled siRNA or siRNA against Nrf2. Immunoblot was measured at 48 hours post-transfection.

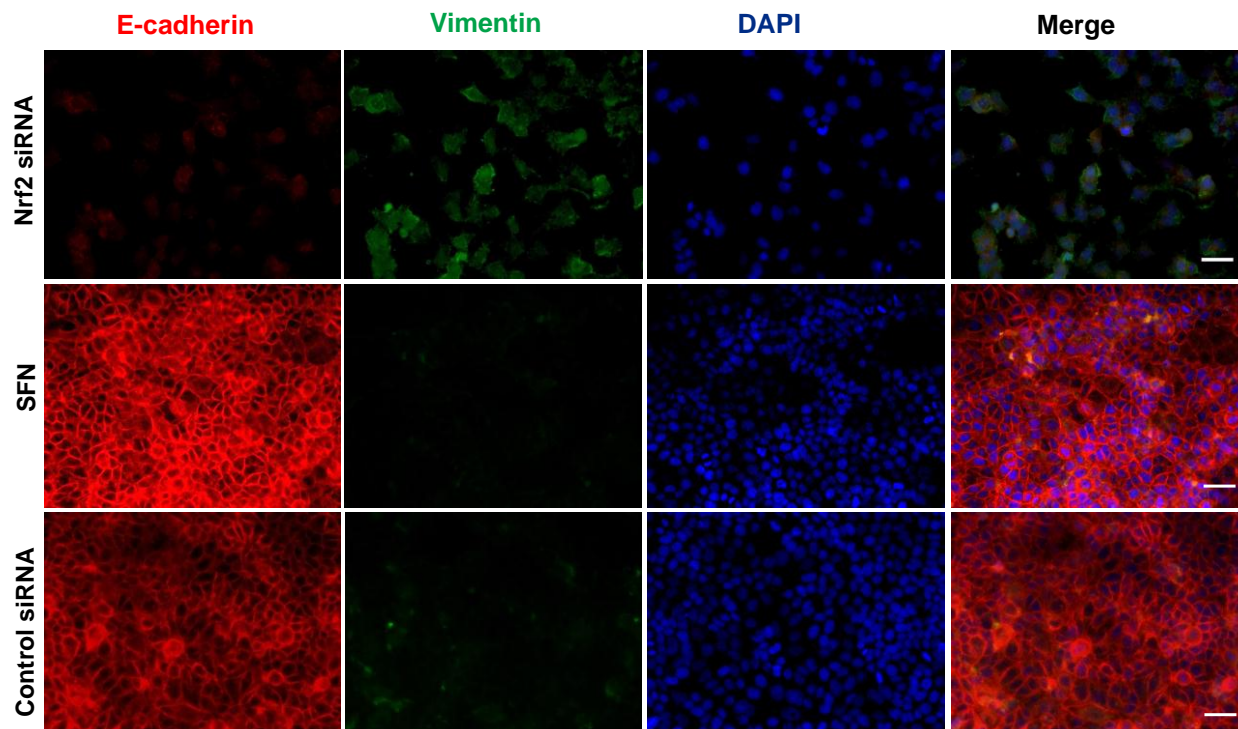

**Fig. S6.** Effect of Nrf2 on cell behaviors in intact monolayer. Cells were treated with 5  $\mu$ m or transfected with Nrf2 siRNA. Control siRNA was included as control. The levels of E-cadherin and vimentin were measured. DAPI was used as counterstain. Scale bars, 50  $\mu$ m.

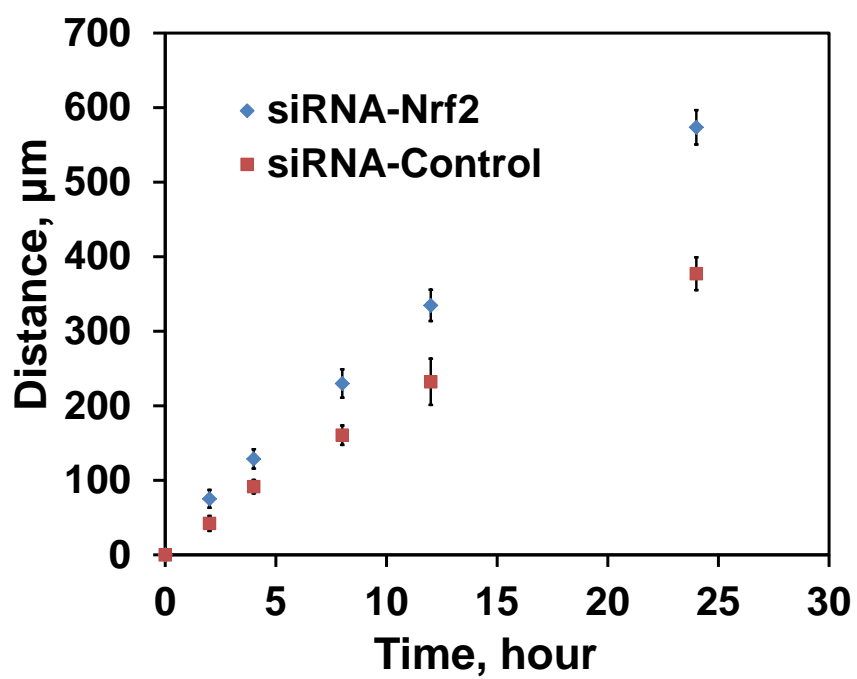

**Fig. S7.** Effect of Nrf2 suppression by siRNA on the migration rate of the wound leading edge.

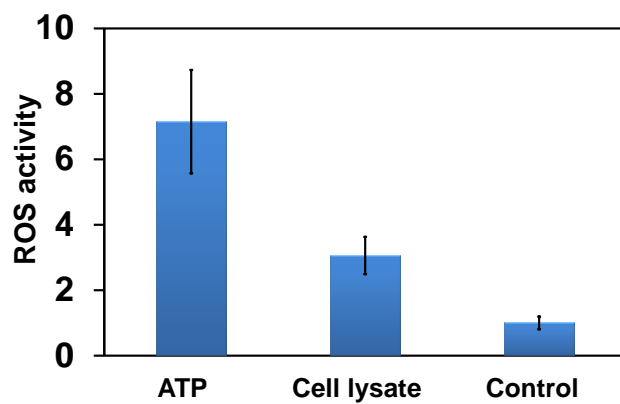

**Fig. S8.** Induction of the ROS level in the cell monolayer by ATP and cell lysate. Control represents loading of cell culture media to the cell monolayer.
